# Supplementary material for: Casein kinase-1γ1 and 3 stimulate tumor necrosis factor-induced necroptosis through RIPK3
Source: PubMed Central journal article supplement (PMC6892881; doi:10.1038/s41419-019-2146-4), 2019-12-04

Supplementary figure 5

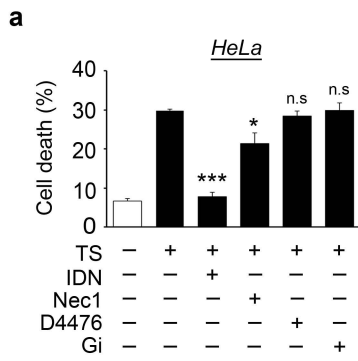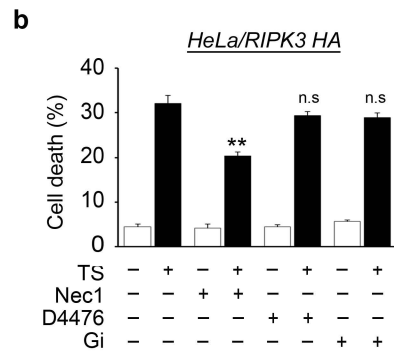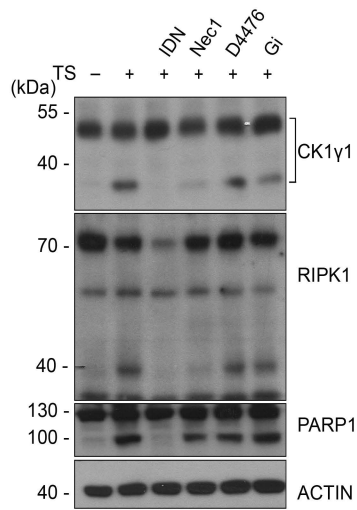

Supplement: 41419_2019_2146_MOESM6_ESM.pdf [file 41419_2019_2146_MOESM6_ESM.pdf]
