# Supplementary material for: Casein kinase-1γ1 and 3 stimulate tumor necrosis factor-induced necroptosis through RIPK3
Source: PubMed Central journal article supplement (PMC6892881; doi:10.1038/s41419-019-2146-4), 2019-12-04
Supplement: 41419_2019_2146_MOESM14_ESM.pdf [file 41419_2019_2146_MOESM14_ESM.pdf]

**Table S1. The list of cDNAs and putative positive clones**

| <b>No.</b> | <b>Kinase</b>    | <b>No.</b> | <b>No.</b>    | <b>No.</b> |           |     |         |
|------------|------------------|------------|---------------|------------|-----------|-----|---------|
| 1          | BMPR1A / ALK3    | 101        | BIKE          | 201        | CDK5R2    | 301 | MAP3K8  |
| 2          | p70S6K1          | 102        | PKCb          | 202        | CKLiK     | 302 | PRKAB1  |
| 3          | p70S6K1 T389E    | 103        | MKK3          | 203        | IHPK3     | 303 | PRKCSH  |
| 4          | p70S6K1 T389A    | 104        | ICK           | 204        | FUK       | 304 | ADK     |
| 5          | BRD3             | 105        | RSKL2         | 205        | MAP2K1    | 305 | NJMU-R1 |
| 6          | BRSK1            | 106        | HIPK2         | 206        | PCK1      | 306 | MAP3K11 |
| 7          | Src Y527F        | 107        | ITPK1         | 207        | PFKM      | 307 | PRKRA   |
| 8          | Pak2             | 108        | CASK(ORF+UTR) | 208        | PIK3R1    | 308 | PCTK1   |
| 9          | p38              | 109        | GIT2          | 209        | PRKAR1A   | 309 | NAGK    |
| 10         | Pak3             | 110        | SNARK         | 210        | PRKD2     | 310 | PGK1    |
| 11         | Pak1             | 111        | SNFILK        | 211        | TBK1      | 311 | CAMKK2  |
| 12         | CAMK2alpha       | 112        | MST1          | 212        | UMP-CMPK  | 312 | PCTK1   |
| 13         | PASK             | 113        | TTK           | 213        | FASTK     | 313 | LIMK2   |
| 14         | MEKK1            | 114        | PAK7          | 214        | IRAK1     | 314 | CCRK    |
| 15         | MEKK1            | 115        | CINP          | 215        | DYRK3     | 315 | MAPK10  |
| 16         | MKK7             | 116        | CTK           | 216        | HGS       | 316 | CAMK2B  |
| 17         | GAA1 / GPAA1     | 117        | STK32A        | 217        | DGKZ      | 317 | CDKL5   |
| 18         | RPK118 / RPS6KC1 | 118        | Nuak2         | 218        | CKS2      | 318 | CAMK1G  |
| 19         | PCTAIRE1         | 119        | c-raf         | 219        | PRKCD     | 319 | PHKG1   |
| 20         | PCTAIRE3         | 120        | PTP4A3        | 220        | FN3K      | 320 | SPHK1   |
| 21         | PRL3             | 121        | MARK4         | 221        | IKBKG     | 321 | AK3L1   |
| 22         | hNeK11L(K61R)    | 122        | ALK7          | 222        | AK1       | 322 | PTK2B   |
| 23         | DOK4             | 123        | AAK1          | 223        | CNK1      | 323 | STK19   |
| 24         | Myt1             | 124        | CHK2          | 224        | PRKAG1    | 324 | CKMT1   |
| 25         | Nek2A            | 125        | TSSK1         | 225        | ZAK       | 325 | CDKN1B  |
| 26         | SBK              | 126        | MEK1          | 226        | MAP3K7IP1 | 326 | RPS6KB1 |
| 27         | TESK1            | 127        | EphA2         | 227        | BCKDK     | 327 | CDKN2C  |
| 28         | TESK2            | 128        | PRKCN         | 228        | SNRK      | 328 | CDKN3   |
| 29         | ULK1             | 129        | ACK1          | 229        | MAP2K3    | 329 | CALM3   |
| 30         | Tyk2             | 130        | ACTR2         | 230        | NEK2      | 330 | ILK     |
| 31         | NDR2             | 131        | AKT1          | 231        | PRKCABP   | 331 | CDK5    |
| 32         | PINK1            | 132        | ALS2CR2       | 232        | PACSIN3   | 332 | SKP1A   |
| 33         | PINK1            | 133        | BRD2          | 233        | ASK       | 333 | RIPK2   |
| 34         | PKN2-GFP         | 134        | BUB1          | 234        | PANK4     | 334 | DAPK3   |
| 35         | ERK8             | 135        | C20orf97      | 235        | MAPKAPK5  | 335 | CKB     |
| 36         | ERK8(K42R)       | 136        | CABC1         | 236        | CDK2      | 336 | CKB     |
| 37         | Rac1             | 137        | CAMK2G        | 237        | MAP2K6    | 337 | PRKCSH  |
| 38         | Cdc42            | 138        | CDK9          | 238        | UCK1      | 338 | CCRK    |
| 39         | RhoA             | 139        | CHUK          | 239        | IKBKAP    | 339 | CSNK1A1 |
| 40         | CaMK I           | 140        | CSK           | 240        | PLK1      | 340 | GALK2   |
| 41         | CaMK IV          | 141        | CSNK1E        | 241        | RIOK1     | 341 | LYK5    |
| 42         | CaMK II $\alpha$ | 142        | CSNK1G1       | 242        | NUCKS     | 342 | WSB1    |
| 43         | CaMK I 1-294     | 143        | CSNK2A1       | 243        | TOPK      | 343 | CALM1   |
| 44         | CaMK I 1-317     | 144        | EEF2K         | 244        | CALM1     | 344 | CAMK1G  |
| 45         | CaMK I 1-317     | 145        | ERBB3         | 245        | AKAP10    | 345 | PDPK1   |
| 46         | CaMK I 1-290     | 146        | FES           | 246        | MELK      | 346 | PRKAG1  |
| 47         | CaMK I 1-290     | 147        | FGFR1         | 247        | SPHK2     | 347 | PRKAR1B |
| 48         | TAK1             | 148        | FGFR4         | 248        | PTK9      | 348 | CDKN2C  |
| 49         | TAK1(K63W)       | 149        | FGR           | 249        | PDK2      | 349 | CDK5    |
| 50         | PDHK1            | 150        | FYN           | 250        | CSNK2B    | 350 | CKMT1   |
| 51         | PDK1             | 151        | GALK1         | 251        | CDK7      | 351 | NUCKS   |
| 52         | PDK1 DEAD        | 152        | GPRK2L        | 252        | PMVK      | 352 | PDXK    |
| 53         | Tlk1(VH113)      | 153        | H11           | 253        | PTK6      | 353 | PRKCH   |
| 54         | Tlk2(KT46)       | 154        | HCK           | 254        | GUK1      | 354 | NAGK    |

|     |                                 |     |           |     |          |     |          |
|-----|---------------------------------|-----|-----------|-----|----------|-----|----------|
| 55  | CK I D                          | 155 | IHPK2     | 255 | DTYMK    | 355 | PGK1     |
| 56  | CK2 $\alpha$                    | 156 | IKBKE     | 256 | URKL1    | 356 | AKAP9    |
| 57  | Hapsin                          | 157 | LCK       | 257 | SKP2     | 357 | AK2      |
| 58  | Hapsin                          | 158 | MAP2K1IP1 | 258 | MAPKAPK3 | 358 | PKMYT1   |
| 59  | HLPK1                           | 159 | MAP3K13   | 259 | STK19    | 359 | SPHK1    |
| 60  | TrkC                            | 160 | MAP3K3    | 260 | PTK9L    | 360 | CSNK2B   |
| 61  | PKC- $\alpha$                   | 161 | MAP3K7    | 261 | PLK2     | 361 | AKAP7    |
| 62  | PKC- $\delta$                   | 162 | MAPK13    | 262 | AK3      | 362 | AK1      |
| 63  | PKC- $\epsilon$                 | 163 | MAPK7     | 263 | CSNK1D   | 363 | STK25    |
| 64  | PKC- $\zeta$                    | 164 | MAPK9     | 264 | STK25    | 364 | CDKN1B   |
| 65  | RAGE1                           | 165 | MAPKAPK2  | 265 | MAPKAP1  | 365 | DOK5     |
| 66  | RAGE3                           | 166 | MARK2     | 266 | PKMYT1   | 366 | CDKN2D   |
| 67  | RAGE4                           | 167 | MATK      | 267 | VRK3     | 367 | CAMK1    |
| 68  | ALK                             | 168 | MLH1      | 268 | CALM2    | 368 | VRK3     |
| 69  | ALK1                            | 169 | MPP1      | 269 | MAP3K8   | 369 | GAK      |
| 70  | ALK4                            | 170 | MST4      | 270 | PRKCDBP  | 370 | PKM2     |
| 71  | AMPK- $\alpha$ 1                | 171 | NDUFA10   | 271 | DYRK3    | 371 | CDK4     |
| 72  | AMPK- $\alpha$ 2                | 172 | NEK4      | 272 | PKM2     | 372 | MAP2K2   |
| 73  | DIK/RIP4/ANKRD3                 | 173 | NEK6      | 273 | DGKA     | 373 | CDK7     |
| 74  | ALK7                            | 174 | NME7      | 274 | PRKAA1   | 374 | SGK      |
| 75  | ALK5                            | 175 | NRBP      | 275 | RPS6KA1  | 375 | LRRK1    |
| 76  | IRE1                            | 176 | PAK4      | 276 | ZAK      | 376 | NTRK3    |
| 77  | MLK1                            | 177 | PDK4      | 277 | PDPK1    | 377 | MAP3K11  |
| 78  | MLK2                            | 178 | PLAU      | 278 | PACSIN2  | 378 | PLK1     |
| 79  | MLK3                            | 179 | PRKACB    | 279 | PKM2     | 379 | PCTK3    |
| 80  | D/N MLK1                        | 180 | PRKCB1    | 280 | GK       | 380 | SPHK2    |
| 81  | D/N MLK2                        | 181 | PRKCG     | 281 | RPS6KA4  | 381 | TP53RK   |
| 82  | D/N MLK3                        | 182 | PRKCL2    | 282 | MARK3    | 382 | MVK      |
| 83  | Erk2                            | 183 | PRPS1     | 283 | GUK1     | 383 | PDK3     |
| 84  | GSK3 $\beta$                    | 184 | PRPS2     | 284 | SPHK1    | 384 | PFKL     |
| 85  | PKC- $\alpha$ catalytic domai   | 185 | RAF1      | 285 | PANK2    | 385 | PIP5K1C  |
| 86  | PKC- $\beta$ catalytic domai    | 186 | RIOK3     | 286 | SRPK1    | 386 | PTK9L    |
| 87  | PKC- $\zeta$ catalytic domai    | 187 | RPS6KA5   | 287 | ZAK      | 387 | UCK1     |
| 88  | PKC- $\epsilon$ catalytic domai | 188 | SGKL      | 288 | HRI      | 388 | FLJ11149 |
| 89  | CHK1                            | 189 | SSTK      | 289 | DGUOK    | 389 | CSNK1G2  |
| 90  | p38g                            | 190 | STK16     | 290 | LIM      | 390 | MKNK2    |
| 91  | MKK4                            | 191 | STK17B    | 291 | MAP3K8   | 391 | LIMK2    |
| 92  | MKK7b                           | 192 | STK3      | 292 | ADCK2    | 392 | PRKAB1   |
| 93  | Akt3                            | 193 | SYK       | 293 | STK25    | 393 | PIK4CA   |
| 94  | JNK1(MARK8)                     | 194 | TNK1      | 294 | MAP2K5   | 394 | BMX      |
| 95  | PDHK2                           | 195 | TRA1      | 295 | MAP3K8   | 395 | ADCK4    |
| 96  | PBK                             | 196 | TRAP1     | 296 | PIK3R2   | 396 | AK3L1    |
| 97  | TOLLIP                          | 197 | TRIM28    | 297 | STK11    | 397 | CARKL    |
| 98  | YWHAE                           | 198 | VRK2      | 298 | DGUOK    | 398 | PRKAG2   |
| 99  | JNK2d                           | 199 | AURKB     | 299 | CLK3     | 399 | AK5      |
| 100 | STK36                           | 200 | CAMK2A    | 300 | SGK      | 400 | ILK      |

| No.              | No.              | No. Phosphatase | No.                                                      |
|------------------|------------------|-----------------|----------------------------------------------------------|
| 401 MINK         | 501 NEK9         | 1 CDKN3         | 101 DUSP12                                               |
| 402 MAP2K6       | 502 TRRAP        | 2 DUSP6         | 102 MKPX                                                 |
| 403 FRK          | 503 MAP3K2       | 3 PP            | 103 PTPN7                                                |
| 404 NTRK2        | 504 MAP3K2/MEKK2 | 4 PPP1R7        | 104 branching-enzyme<br>interacting DUSP                 |
| 405 MARK3        | 505 ACVR2        | 5 PPP1R1B       | 105 serine/threonine/tyrosine<br>interacting-like 1      |
| 406 CLK3         | 506 PYK2         | 6 PPP1R8        | 106 PTPRO                                                |
| 407 MAPK11       | 507 JNK3(MAPK10) | 7 ENPP6         | 107 PTP non-receptor type 18                             |
| 408 PKLR         | 508 Slob         | 8 PPP3CC        | 108 PTPase-alpha                                         |
| 409 TEK          | 509 p38a         | 9 THTPA         | 109 PTPRM                                                |
| 410 MAPK14       | 510 FLJ10074     | 10 PPP2R1A      | 110 PTPRB                                                |
| 411 PFKP         | 511 CK1g2        | 11 ACP1         | 111 PTPRH                                                |
| 412 AK3          | 512 PANK3        | 12 PPP5C        | 112 IAR/receptor-like PTP                                |
| 413 GK2          | 513 WBP2         | 13 PSTPIP1      | 113 PTP non-receptor type 4                              |
| 414 STK22C       | 514 MST2         | 14 PR48         | 114 PTPRO                                                |
| 415 CAMKK1       | 515 EphA4        | 15 PPA2         | 115 hematopoietic cell<br>phosphatase                    |
| 416 PIP5K2B      | 516 SGK3         | 16 PSTPIP2      | 116 PTPRT                                                |
| 417 ADCK4        | 517 CDK5R1       | 17 PTPN1        | 117 PTPRS                                                |
| 418 ZAP70        | 518 TIE2         | 18 PPP2R2D      | 118 PTPN2 (1-1256)                                       |
| 419 CDK6         | 519 CKMT2        | 19 PTPN4        | 119 PTPRZ1                                               |
| 420 PIP5K3       | 520 PFKFB4       | 20 PPP2R5D      | 120 PTPN13                                               |
| 421 GK           | 521 PDHK4        | 21 PPP1R12C     | 121 PTPN3 (1233-1916)<br>WT =2742(full)                  |
| 422 MAP2K3       | 522 MAPK6        | 22 PTPN9        | 122 PTPRE (1-2387) full length                           |
| 423 PHKB         | 523 PIK3R3       | 23 FLJ32332     | 123 PTPRK                                                |
| 424 MGC45419     | 524 PDHK1        | 24 PR48         | 124 PTPN14                                               |
| 425 CAMK1G       | 525 EphA7        | 25 INPP1        | 125 CDC25C                                               |
| 426 CAMK2D       | 526 TSSK3        | 26 ACYP2        | 126 ACP1                                                 |
| 427 TLK1         | 527 MAP4K2/GCK   | 27 DUSP22       | 127 sphoserine/threonine/ty<br>rosine interactionprotein |
| 428 MAP3K14      | 528 NIK          | 28 PPM1D        |                                                          |
| 429 STK24        | 529 JNK2 (MAPK9) | 29 RNGTT        |                                                          |
| 430 ADRBK1       | 530 PDK1         | 30 PPM1F        |                                                          |
| 431 STK32B       | 531 JAK3         | 31 PPP2CB       |                                                          |
| 432 TIE          | 532 MLKL         | 32 PFKFB4       |                                                          |
| 433 CAMK1D       | 533 GSK3A        | 33 ALPP         |                                                          |
| 434 PIK3CG       | 534 MAST1        | 34 ACP6         |                                                          |
| 435 PRKACG       | 535 ALK2         | 35 PPM1A        |                                                          |
| 436 FASTK        | 536 PAK6         | 36 PTPNS1       |                                                          |
| 437 PGK2         | 537 TESK1        | 37 PTPRA        |                                                          |
| 438 AXL          | 538 BARK1        | 38 FBP1         |                                                          |
| 439 HK3          | 539 ADRBK2       | 39 PPM1B        |                                                          |
| 440 FLT3LG       | 540 PRKCL1       | 40 PHPT1        |                                                          |
| 441 EK1          | 541 HSA250839    | 41 PPP2R2B      |                                                          |
| 442 K1H9         | 542 TIE1         | 42 PPP3R1       |                                                          |
| 443 MAST205      | 543 EphA8        | 43 PPP3CA       |                                                          |
| 444 DRAK1        | 544 FLT1         | 44 DUSP10       |                                                          |
| 445 EIF2AK4      | 545 p70S6K       | 45 PTPNS1L2     |                                                          |
| 446 DDR2         | 546 PDHK3        | 46 PHACTR4      |                                                          |
| 447 SAST         | 547              | 47 PPP1R12B     |                                                          |
| 448 KPI2 (LMTK2) | 548              | 48 PPP2CA       |                                                          |
| 449 KPI2         | 549              | 49 PSTPIP2      |                                                          |
| 450 SRM          | 550              | 50 PPP3CB       |                                                          |
| 451 PKCa         |                  | 51 ACYP1        |                                                          |
| 452 Trad         |                  | 52 PNKP         |                                                          |
| 453 STK39        |                  | 53 MINPP1       |                                                          |
| 454 MAP3K10/MLK2 |                  | 54 DUSP3        |                                                          |

|     |              |     |                                |
|-----|--------------|-----|--------------------------------|
| 455 | PRKAG2/AMPK  | 55  | PPP2CB                         |
| 456 | MRCKb        | 56  | PPP6C                          |
| 457 | STLK5        | 57  | DUSP14                         |
| 458 | IKKb         | 58  | PTPNS1                         |
| 459 | EphB4        | 59  | PTEN                           |
| 460 | JNK1 (MAPK8) | 60  | PTPN9                          |
| 461 | NEK4         | 61  | DUSP6                          |
| 462 | ULK1         | 62  | PPP3CB                         |
| 463 | ERBB2        | 63  | PTN                            |
| 464 | NEK2         | 64  | PTPN12                         |
| 465 | AKT2         | 65  | DUSP11                         |
| 466 | PTK2         | 66  | MTMR9                          |
| 467 | CDC7         | 67  | PTPRR                          |
| 468 | PKACa        | 68  | EPM2A                          |
| 469 | RIOK2        | 69  | PPP2R1A                        |
| 470 | PKN3         | 70  | PPP2R2A                        |
| 471 | DYRK4        | 71  | FLJ20442                       |
| 472 | EVA1         | 72  | MK-STYX                        |
| 473 | PLK2         | 73  | DUSP5                          |
| 474 | MYT1         | 74  | FLJ20300                       |
| 475 | PLK4         | 75  | PPM1A                          |
| 476 | ADCK5        | 76  | MGC1136                        |
| 477 | HER3/ErbB3   | 77  | PPP1CB                         |
| 478 | PAK1         | 78  | DUSP1                          |
| 479 | MAST4        | 79  | SET                            |
| 480 | LATS1        | 80  | PTPN11                         |
| 481 | MAST2        | 81  | PTPN2                          |
| 482 | CSNK1G3      | 82  | hypothetical protin / RIKEN    |
| 483 | MNK1         | 83  | myotubularin related protein 8 |
| 484 | PRKX         | 84  | DUSP23                         |
| 485 | RSK1         | 85  | hSSH-1L                        |
| 486 | RYK          | 86  | PTPRO                          |
| 487 | Haspin       | 87  | DUSP15                         |
| 488 | PLAUR        | 88  | KIAA1075 protein               |
| 489 | IHPK1        | 89  | KIAA protein                   |
| 490 | CHK2         | 90  | DUSP13                         |
| 491 | NRBP1        | 91  | tensin                         |
| 492 | MSK2         | 92  | MMAC1                          |
| 493 | MASTL        | 93  | PTP4A2                         |
| 494 | ADCK3(CABC1) | 94  | KAP1                           |
| 495 | GADD45G      | 95  | DUSP1                          |
| 496 | TGFbR1       | 96  | DUSP2                          |
| 497 | CK2a2        | 97  | DUSP3                          |
| 498 | MAP3K4       | 98  | DUSP6                          |
| 499 | LKB1 (STK11) | 99  | DSUP7                          |
| 500 | p70S6Kb      | 100 | DUSP9                          |
