# Supplementary material for: Casein kinase-1γ1 and 3 stimulate tumor necrosis factor-induced necroptosis through RIPK3
Source: PubMed Central journal article supplement (PMC6892881; doi:10.1038/s41419-019-2146-4), 2019-12-04
Supplement: 41419_2019_2146_MOESM15_ESM.pdf [file 41419_2019_2146_MOESM15_ESM.pdf]

**Table S2. The number and ratio of phosphorylated peptides at CK1 $\gamma$ 3 Ser344 or Ser345 identified by of liquid chromatography tandem-mass spectrometry (LC-MS/MS).**

|                            |      | The number of peptides identified<br>phosphorylated:non-phosphorylated (ratio, %) |                 |
|----------------------------|------|-----------------------------------------------------------------------------------|-----------------|
| Phospho-peptide            | Site | NT                                                                                | TSI             |
| QLPTVGVAVQQDPALS*SNREAHQHR | S344 | 15:78 (16.13 %)                                                                   | 22:87 (20.18 %) |
| QLPTVGVAVQQDPALSS*NREAHQHR | S345 | 9:84 (9.68 %)                                                                     | 15:94 (13.76 %) |
